# Supplementary material
Source: publisher figshare collection journal article supplement (https://acs.figshare.com/ndownloader/files/29027209)
Supplement: Supplementary file 1 [file 29027209]

## Support Information

### SiO<sub>2</sub>-Coated Fe<sub>3</sub>O<sub>4</sub> Nanoparticle/Polyacrylonitrile Beads for One-Step Lipase

#### Immobilization

*Jiawei Lu a, b, c, Youran Li a, b, c \*, Huilin Zhu a, b, c, Guiyang Shi a, b, c \**

<sup>a</sup> Key Laboratory of Industrial Biotechnology, Ministry of Education, School of Biotechnology,

Jiangnan University, Wuxi, Jiangsu Province 214122, P. R. China.

<sup>b</sup> National Engineering Laboratory for Cereal Fermentation Technology, Jiangnan University,

1800 Lihu Avenue, Wuxi, Jiangsu Province 214122, P. R. China.

<sup>c</sup> Jiangsu Provisional Research Center for Bioactive Product Processing Technology, Jiangnan

University, 1800 Lihu Avenue, Wuxi, Jiangsu Province 214122, P. R. China.

‡These authors contributed equally to this work.

\*Corresponding authors.

\*Guiyang Shi

E-mail: gyshi@jiangnan.edu.cn. Tel: +86-510-85918235

ORCID ID: <https://orcid.org/0000-0001-5147-0238>

\*Youran Li

Email: liyouran@jiangnan.edu.cn

ORCID ID: <https://orcid.org/0000-0003-3396-4132>

## 1. Detailed Procedures for Optimizing the Fabrication Conditions of L/FP

### *Optimization of PAN. Molecular Weight*

PAN with different molecular weights (M.w.=10 k, 30 k, 50 k, 80 k, 150 k, and 250 k) were firstly dissolved in DMF at a concentration of 20 wt%. The 1 mL the PAN solution was mixed with 27.5 mg Fe<sub>3</sub>O<sub>4</sub> nanoparticles, 0.9 mL DMF, and 0.1 mL PEG 200 substantially. Next, the mixture was extruded from a needle with a diameter of 0.2 mm and dropped into the 2 mg/mL lipase solution (as a coagulation bath). After stirring for 24 h at RT, magnetic PAN composite beads with lipase were washed by PBS buffer (50 mM, pH=7.0). Finally, the L/FP hollow composite beads with different molecular weight of PAN were obtained. The porosity of the L/FPs was measured by the method in **Section 2.5** of the manuscript and the activity measured by the method in **Section 2.6.2** of the manuscript.

### *Optimization of PAN Concentration*

PAN (M.w.= 80 k) was firstly dissolved in DMF at a concentration of 20 wt%. The PAN solution was mixed with 27.5 mg  $\text{Fe}_3\text{O}_4$  nanoparticles, 0.9 mL DMF, and 0.1 mL PEG 200 substantially with a final concentration of 3.6, 5.5, 7.3, 8.9, 10, 11.1, 14, 16, 18, and 20 wt% respectively. Next, the mixture was extruded from a needle with a diameter of 0.2 mm and dropped into the 2 mg/mL lipase solution (as a coagulation bath). After stirring for 24 h at RT, magnetic PAN composite beads with lipase were washed by PBS buffer (50 mM, pH=7.0). Finally, the L/FP hollow composite beads with different molecular weight of PAN were obtained (the concentration of PAN under 3.6 wt% was hard to solidify as a bead). The porosity of the L/FPs was measured by the method in **Section 2.5** of the manuscript and the activity measured by the method in **Section 2.6.2** of the manuscript.

#### *Optimization of the Concentration of $\text{Fe}_3\text{O}_4$ Nanoparticles*

PAN (M.w.= 80 k) was firstly dissolved in DMF at a concentration of 20 wt%. The PAN solution with a final concentration of 10 wt% was substantially mixed with  $\text{Fe}_3\text{O}_4$  nanoparticles at concentration of 0, 2.5, 5, 10, 20, 40, 60, 80, 100, 120, 150, 200, 400, 600, 800, 1000 mmol/L respectively (10% PEG 200 in DMF as solvents). Next, the mixture was extruded from a needle with a diameter of 0.2 mm and dropped into the 2 mg/mL lipase solution (as a coagulation bath).

After stirring for 24 h at RT, magnetic PAN composite beads with lipase were washed by PBS buffer (50 mM, pH=7.0). Finally, the L/FP hollow composite beads with different molecular weight of PAN were obtained (the concentration of PAN under 3.6 wt% was hard to solidify as a bead). The porosity of the L/FPs was measured by the method in **Section 2.5** of the manuscript and the activity measured by the method in **Section 2.6.2** of the manuscript.

#### *Optimization of the Types of Porogens*

PAN (M.w.= 80 k) was firstly dissolved in DMF at a concentration of 20 wt%. The 1 mL the PAN solution was mixed with 27.5 mg Fe<sub>3</sub>O<sub>4</sub> nanoparticles, 0.9 mL DMF, and 0.1 mL porogens (glycerol, PEG 200/400/600/2000, and PEI 600/1800/10000 respectively) substantially. Next, the mixture was extruded from a needle with a diameter of 0.2 mm and dropped into the 2 mg/mL lipase solution (as a coagulation bath). After stirring for 24 h at RT, magnetic PAN composite beads with lipase were washed by PBS buffer (50 mM, pH=7.0). Finally, the L/FP hollow composite beads with different molecular weight of PAN were obtained. The porosity of the L/FPs was measured by the method in **Section 2.5** of the manuscript and the activity measured by the method in **Section 2.6.2** of the manuscript.

#### *Optimization of the concentration of PEG 200*

PAN (M.w.= 80 k) was firstly dissolved in DMF at a concentration of 20 wt%. The 1 mL the PAN solution was mixed with 27.5 mg Fe<sub>3</sub>O<sub>4</sub> nanoparticles and 1 mL different solvents (0, 0.5, 1.25, 2.5, 5, 10, and 20% PEG 200 in DMF respectively) substantially. Next, the mixture was extruded from a needle with a diameter of 0.2 mm and dropped into the 2 mg/mL lipase solution (as a coagulation bath). After stirring for 24 h at RT, magnetic PAN composite beads with lipase were washed by PBS buffer (50 mM, pH=7.0). Finally, the L/FP hollow composite beads with different molecular weight of PAN were obtained. The porosity of the L/FPs was measured by the method in **Section 2.5** of the manuscript and the activity measured by the method in **Section 2.6.2** of the manuscript.

#### *Optimization of Lipase Coagulation Bath*

PAN (M.w.= 80 k) was firstly dissolved in DMF at a concentration of 20 wt%. The 1 mL the PAN solution was mixed with 27.5 mg Fe<sub>3</sub>O<sub>4</sub> nanoparticles, 0.9 mL DMF, and 0.1 mL PEG 200 substantially. Next, the mixture was extruded from a needle with a diameter of 0.2 mm and dropped into the lipase solution at concentration of 0.023, 0.398, 1.315, 3.165, 3.763, and 5.573 g/L respectively (as a coagulation bath). After stirring for 24 h at RT, magnetic PAN composite beads with lipase were washed by PBS buffer (50 mM, pH=7.0). Finally, the L/FP hollow

composite beads with different molecular weight of PAN were obtained (the concentration of PAN under 3.6 wt% was hard to solidify as a bead). The porosity of the L/FPs was measured by the method in **Section 2.5** of the manuscript and the activity measured by the method in **Section 2.6.2** of the manuscript.

#### *Optimization of DMF Concentration in the Coagulation*

PAN (M.w.= 80 k) was firstly dissolved in DMF at a concentration of 20 wt%. The 1 mL the PAN solution was mixed with 27.5 mg Fe<sub>3</sub>O<sub>4</sub> nanoparticles, 0.9 mL DMF, and 0.1 mL PEG 200 substantially. Next, the mixture was extruded from a needle with a diameter of 0.2 mm and dropped into the 2 g/L lipase solution containing 0, 20, 40, 60, 80, and 100% DMF respectively (as a coagulation bath). After stirring for 24 h at RT, magnetic PAN composite beads with lipase were washed by PBS buffer (50 mM, pH=7.0). Finally, the L/FP hollow composite beads with different molecular weight of PAN were obtained (the concentration of PAN under 3.6 wt% was hard to solidify as a bead). The porosity of the L/FPs was measured by the method in Section 2.5 of the manuscript and the activity measured by the method in Section 2.6.2 of the manuscript.

#### *Optimization of Composite Bead Sizes*

PAN (M.w.= 80 k) was firstly dissolved in DMF at a concentration of 20 wt%. The 1 mL the PAN solution was mixed with 27.5 mg Fe<sub>3</sub>O<sub>4</sub> nanoparticles, 0.9 mL DMF, and 0.1 mL PEG 200 substantially. Next, the mixture was extruded from a needle with different diameters and dropped into the 2 g/L lipase solution (as a coagulation bath). After stirring for 24 h at RT, magnetic PAN composite beads with lipase were washed by PBS buffer (50 mM, pH=7.0). Finally, the L/FP hollow composite beads with different molecular weight of PAN were obtained (the concentration of PAN under 3.6 wt% was hard to solidify as a bead). The porosity of the L/FPs was measured by the method in **Section 2.5** of the manuscript and the activity measured by the method in **Section 2.6.2** of the manuscript.

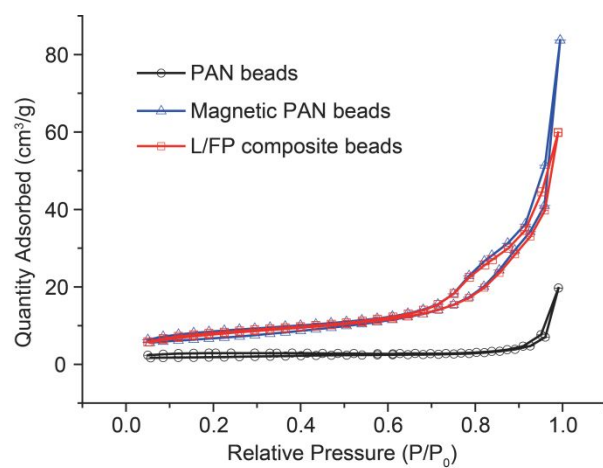

**Figure S1.** N<sub>2</sub> adsorption and desorption isotherms of the PAN hollow beads (black), magnetic PAN hollow beads (blue), and L/FP hollow composite beads (red).



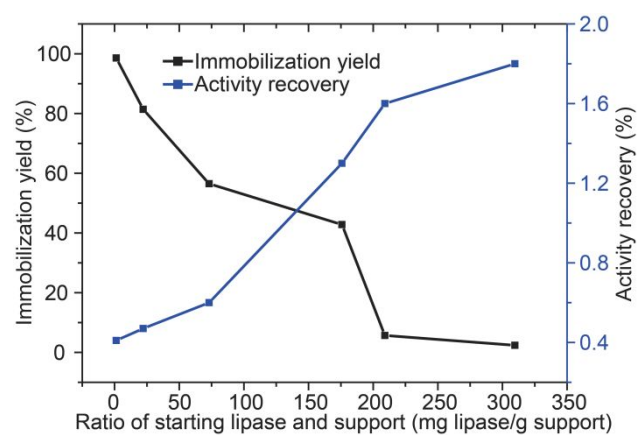

**Figure S2.** Immobilized yield (black) and activity recovery (blue) of L/FP based on a gradient of the mass ratio of starting lipase and support.
